# Supplementary material for: Biochemical, Kinetic, and Spectroscopic Characterization of Ruegeria pomeroyi DddW—A Mononuclear Iron-Dependent DMSP Lyase
Source: PubMed Central journal article supplement (PMC4437653; doi:10.1371/journal.pone.0127288), 2015-05-19
Supplement: pone.0127288.s006.pdf [file pone.0127288.s006.pdf]

**Table S1. DddW activity and yield during the course of purification.** Whole cell lysate (WCL), cell free lysate (CFL), post Ni-NTA, post size exclusion (post SEC), and after a freeze-thaw.

|             | Total volume (mL) | Concentration (mg/mL) | Total protein (mg) | Activity ( $\mu\text{M}$ of acrylate) | Total Activity ( $\mu\text{mol}$ of acrylate) | Specific Activity ( $\mu\text{mol}/(\text{sec}\cdot\text{mg})$ ) | Purification factor | Yield (%) |
|-------------|-------------------|-----------------------|--------------------|---------------------------------------|-----------------------------------------------|------------------------------------------------------------------|---------------------|-----------|
| WCL         | 30                | 139.36                | 4180.8             | 5049.80                               | 151.49                                        | 0.01                                                             | 1                   | 100       |
| CFL         | 25                | 113.98                | 2849.5             | 5267.28                               | 131.68                                        | 0.02                                                             | 1.53                | 87        |
| post Ni-NTA | 60                | 0.63                  | 37.8               | 1833.27                               | 110.00                                        | 0.40                                                             | 40.15               | 73        |
| post SEC    | 5.75              | 3.52                  | 20.2               | 8122.58                               | 46.70                                         | 3.34                                                             | 332.25              | 31        |
| freeze thaw | 5.75              | 3.52                  | 20.2               | 7703.46                               | 44.29                                         | 3.17                                                             | -                   | -         |
