# Supplementary material for: Biochemical, Kinetic, and Spectroscopic Characterization of Ruegeria pomeroyi DddW—A Mononuclear Iron-Dependent DMSP Lyase
Source: PubMed Central journal article supplement (PMC4437653; doi:10.1371/journal.pone.0127288), 2015-05-19
Supplement: pone.0127288.s007.pdf [file pone.0127288.s007.pdf]

**Table S2. DddW preferentially uptakes iron from growth media.** Metal analysis using ICP-OES of wild-type apo-DddW grown in minimal media supplemented with a mixture of chloride salts of metal ions, Mn(II), Co(II), Fe(III), Ni(II), Cu(II), and Zn(II).

| <b>Metal content (mol metal ion/mol of DddW)</b> |       |       |       |       |       |       |
|--------------------------------------------------|-------|-------|-------|-------|-------|-------|
|                                                  | Mn    | Fe    | Co    | Ni    | Cu    | Zn    |
| DddW                                             | 0.050 | 0.208 | 0.068 | 0.072 | 0.021 | 0.108 |
